# Supplementary material for: Evidence of Infection with Zoonotic Mosquito-Borne Flaviviruses in Saltwater Crocodiles (Crocodylus porosus) in Northern Australia
Source: MDPI journal article supplement (doi:10.3390/v14051106), 2022-05-21
Supplement: s1 [file s1]

### Frequency of co-infection or cross-reactivity among tested samples

[illegible]
