# Supplementary material for: Evidence of Infection with Zoonotic Mosquito-Borne Flaviviruses in Saltwater Crocodiles (Crocodylus porosus) in Northern Australia
Source: MDPI journal article supplement (doi:10.3390/v14051106), 2022-05-21
Supplement: s1 [file s1]

Summary data of 6B6C-1 blocking ELISA and virus neutralisation test

| SN | Samples | Farm   | Percentage of inhibition | Virus neutralising antibody titres |      |      |     |      |     |      |        |     | VNT Results       |
|----|---------|--------|--------------------------|------------------------------------|------|------|-----|------|-----|------|--------|-----|-------------------|
|    |         |        | 6B6C-1                   | WNV                                | MVEV | ALFV | FRV | SEPV | EHV | KOKV | STRATV | NMV |                   |
| 1  | A02     | Farm A | 86.41                    | 320                                | 20   | 0    | 40  | 20   | 0   | 0    | 0      | 0   | WNV, FRV          |
| 2  | A03     | Farm A | 38.85                    | 160                                | 0    | 0    | 0   | 20   | 0   | 0    | 0      | 0   | WNV, SEPV         |
| 3  | A04     | Farm A | 60.00                    | 40                                 | 0    | 0    | 20  | 0    | 0   | 0    | 0      | 0   | WNV, FRV          |
| 4  | A06     | Farm A | 82.20                    | 640                                | 20   | 0    | 20  | 0    | 0   | 0    | 80     | 0   | WNV, STRATV       |
| 5  | A07     | Farm A | 70.15                    | ND                                 | 0    | 0    | 20  | 0    | 0   | 0    | 80     | 0   | FRV, STRATV       |
| 6  | A09     | Farm A | 74.25                    | 0                                  | 0    | 0    | 40  | 20   | 0   | 0    | 80     | 0   | FRV, STRATV       |
| 7  | A23     | Farm A | 84.40                    | 40                                 | 0    | 0    | 0   | 0    | 0   | 0    | 0      | 0   | WNV               |
| 8  | A27     | Farm A | 60.81                    | 0                                  | 0    | 0    | 0   | 0    | 0   | 0    | 0      | 0   | unknown           |
| 9  | A28     | Farm A | 35.57                    | 0                                  | 0    | 0    | 20  | 0    | 0   | 0    | 0      | 0   | FRV               |
| 10 | A29     | Farm A | 50.07                    | 0                                  | 0    | 0    | 20  | 0    | 0   | 0    | 0      | 0   | FRV               |
| 11 | A30     | Farm A | 36.93                    | 0                                  | 0    | 0    | 20  | 0    | 0   | 0    | 0      | 0   | FRV               |
| 12 | A31     | Farm A | 44.68                    | 0                                  | 0    | 0    | 0   | 0    | 0   | 0    | 0      | 0   | unknown           |
| 13 | A32     | Farm A | 33.62                    | 0                                  | 0    | 0    | 20  | 0    | 0   | 0    | 0      | 0   | FRV               |
| 14 | A33     | Farm A | 37.14                    | 0                                  | 0    | 0    | 20  | 0    | ND  | 0    | 20     | 0   | FRV, STRATV       |
| 15 | A35     | Farm A | 44.77                    | 20                                 | 0    | 0    | 20  | 0    | 0   | 0    | 0      | 0   | WNV, FRV          |
| 16 | A36     | Farm A | 69.80                    | 0                                  | 0    | 0    | 20  | 0    | 0   | 0    | 0      | 0   | FRV               |
| 17 | A37     | Farm A | 73.18                    | 0                                  | 0    | 40   | 20  | 0    | 0   | 0    | 0      | 0   | ALFV, FRV         |
| 18 | A41     | Farm A | 41.15                    | 0                                  | 0    | 0    | 0   | 0    | 0   | 0    | 0      | 0   | unknown           |
| 19 | A42     | Farm A | 62.41                    | 0                                  | ND   | 0    | 20  | 0    | 0   | 0    | 0      | 0   | FRV               |
| 20 | A47     | Farm A | 31.65                    | 0                                  | 0    | 0    | 0   | 0    | 0   | 20   | 0      | 0   | KOKV              |
| 21 | A52     | Farm A | 68.10                    | 40                                 | ND   | 0    | 20  | ND   | 0   | 0    | 0      | 0   | WNV, FRV          |
| 22 | A53     | Farm A | 32.50                    | 20                                 | 0    | 0    | 0   | 0    | 0   | 0    | 0      | 0   | WNV               |
| 23 | A54     | Farm A | 52.90                    | 80                                 | 0    | 0    | 160 | 0    | 0   | 0    | 80     | 0   | WNV, FRV, STRATV  |
| 24 | A56     | Farm A | 67.04                    | 160                                | 0    | 0    | 160 | ND   | 0   | 0    | 0      | 0   | WNV, FRV          |
| 25 | A57     | Farm A | 35.32                    | 0                                  | 0    | 0    | 0   | 0    | 0   | 0    | 20     | 0   | STRATV            |
| 26 | A58     | Farm A | 64.33                    | 0                                  | 0    | 0    | 20  | 0    | 0   | 0    | 0      | 0   | FRV               |
| 27 | A59     | Farm A | 50.47                    | 0                                  | ND   | 0    | 40  | 0    | 0   | 0    | 0      | 0   | FRV               |
| 28 | A63     | Farm A | 51.86                    | 0                                  | 0    | 0    | 0   | ND   | 0   | 0    | 0      | 0   | unknown           |
| 29 | A65     | Farm A | 41.10                    | 0                                  | 0    | 0    | 0   | ND   | 0   | 0    | 0      | 0   | unknown           |
| 30 | A66     | Farm A | 38.32                    | 80                                 | 0    | 0    | 40  | ND   | 0   | 0    | 80     | 0   | WNV, STRATV, FRV  |
| 31 | A68     | Farm A | 43.18                    | 40                                 | 0    | 0    | 0   | 0    | 0   | 0    | 0      | 0   | WNV               |
| 32 | A69     | Farm A | 50.16                    | 320                                | ND   | 0    | 160 | 640  | 0   | 0    | 160    | 0   | WNV, STRATV, SEPV |
| 33 | A71     | Farm A | 37.72                    | 0                                  | 0    | 0    | 0   | 20   | 20  | 0    | 40     | 0   | STRATV, SEPV      |
| 34 | A75     | Farm A | 55.22                    | 0                                  | 0    | 0    | 0   | 20   | 0   | 0    | 0      | 0   | SEPV              |
| 35 | A76     | Farm A | 49.80                    | 0                                  | 0    | 0    | 0   | 0    | 0   | 0    | 0      | 0   | unknown           |
| 36 | A77     | Farm A | 39.04                    | 20                                 | 0    | 0    | 20  | 0    | 0   | 0    | 80     | 0   | WNV, FRV, STRATV  |
| 37 | A78     | Farm A | 51.79                    | 0                                  | 40   | 0    | 40  | ND   | 0   | 0    | 0      | 0   | MVEV, FRV         |
| 38 | A79     | Farm A | 73.87                    | 80                                 | 0    | 0    | 40  | 0    | 0   | 0    | 80     | 0   | WNV, FRV, STRATV  |
| 39 | A80     | Farm A | 78.34                    | 80                                 | 0    | 0    | 40  | 0    | 0   | 0    | 0      | 0   | WNV, FRV          |
| 40 | A82     | Farm A | 57.79                    | 20                                 | 0    | 0    | 0   | 0    | 0   | 0    | 0      | 0   | WNV               |
| 41 | A83     | Farm A | 34.90                    | 20                                 | 0    | 0    | 20  | 0    | 0   | 0    | 80     | 0   | WNV, FRV, STRATV  |
| 42 | A85     | Farm A | 56.82                    | 0                                  | 0    | 0    | 40  | 0    | 0   | 0    | 0      | 0   | FRV               |
| 43 | A86     | Farm A | 72.76                    | 1280                               | 0    | 0    | 20  | 40   | ND  | 0    | 40     | 0   | WNV, STRATV, SEPV |
| 44 | A92     | Farm A | 89.29                    | 80                                 | 0    | 0    | 0   | 0    | 0   | 0    | 40     | 0   | WNV, STRATV       |
| 45 | A93     | Farm A | 63.03                    | 0                                  | 0    | 0    | 20  | ND   | 0   | 0    | 0      | 0   | FRV               |

|    |      |        |       |      |    |     |    |    |    |   |     |    |                   |
|----|------|--------|-------|------|----|-----|----|----|----|---|-----|----|-------------------|
| 46 | A95  | Farm A | 75.56 | 40   | 0  | 0   | 40 | 20 | 0  | 0 | 0   | 0  | WNV, FRV          |
| 47 | A97  | Farm A | 32.64 | 20   | 0  | 0   | 0  | 0  | 0  | 0 | 0   | 0  | WNV               |
| 48 | A98  | Farm A | 38.40 | 0    | 0  | 0   | 20 | 0  | 20 | 0 | 0   | 0  | FRV, EHV          |
| 49 | A99  | Farm A | 61.52 | 0    | 0  | 0   | 0  | 0  | ND | 0 | 0   | 0  | unknown           |
| 50 | A100 | Farm A | 55.25 | 0    | 0  | 0   | 20 | 0  | 20 | 0 | ND  | 0  | FRV, EHV          |
| 51 | A104 | Farm A | 76.02 | 2560 | 0  | 0   | 0  | ND | 0  | 0 | 0   | 0  | WNV               |
| 52 | A108 | Farm A | 38.79 | 80   | 20 | 0   | 20 | 0  | ND | 0 | 40  | 0  | WNV, FRV, STRATV  |
| 53 | A114 | Farm A | 61.05 | 0    | 0  | 0   | 20 | 0  | 0  | 0 | 0   | 0  | FRV               |
| 54 | A115 | Farm A | 77.91 | 2560 | 20 | 0   | 20 | 0  | ND | 0 | 160 | 80 | WNV, STRATV, NMV  |
| 55 | A116 | Farm A | 48.82 | 2560 | 0  | 0   | 80 | ND | 0  | 0 | 0   | 0  | WNV               |
| 56 | A122 | Farm A | 47.21 | 0    | ND | 0   | 20 | 20 | 0  | 0 | 0   | 0  | FRV, SEPV         |
| 57 | A123 | Farm A | 34.66 | 0    | 0  | 0   | 0  | 0  | 0  | 0 | 0   | 0  | unknown           |
| 58 | A127 | Farm A | 74.99 | 20   | ND | 0   | 20 | ND | 0  | 0 | 20  | 0  | WNV, FRV, STRATV  |
| 59 | A129 | Farm A | 43.15 | 0    | 0  | 0   | 0  | 0  | 0  | 0 | 20  | 0  | STRATV            |
| 60 | A131 | Farm A | 68.00 | 20   | 20 | 320 | 20 | ND | 0  | 0 | 80  | 0  | ALFV, FRV, STRATV |
| 61 | A135 | Farm A | 48.03 | 20   | 0  | 0   | 0  | 0  | 0  | 0 | 0   | 0  | WNV               |
| 62 | A137 | Farm A | 56.71 | 20   | 80 | 0   | 40 | 20 | 0  | 0 | 80  | 0  | MVEV, FRV, STRATV |
| 63 | A139 | Farm A | 40.94 | 0    | 0  | 0   | 0  | 0  | 0  | 0 | 40  | 0  | STRATV            |
| 64 | A146 | Farm A | 49.85 | 20   | 0  | 0   | 0  | ND | 0  | 0 | 0   | 0  | WNV               |
| 65 | A148 | Farm A | 54.98 | 20   | 0  | 0   | 0  | 0  | 0  | 0 | 80  | 0  | WNV, STRATV       |
| 66 | A149 | Farm A | 30.32 | 0    | ND | 0   | 0  | 0  | 0  | 0 | 0   | 0  | unknown           |
| 67 | A150 | Farm A | 51.32 | 0    | ND | 0   | 20 | 0  | 0  | 0 | 0   | 0  | FRV               |
| 68 | A157 | Farm B | 41.91 | 20   | 0  | 0   | 0  | 0  | 0  | 0 | 0   | 0  | WNV               |
| 69 | A158 | Farm B | 63.91 | 40   | 0  | 0   | 20 | 0  | 0  | 0 | 0   | 0  | WNV, FRV          |
| 70 | A159 | Farm B | 51.34 | 40   | 0  | 0   | 0  | 0  | 0  | 0 | 0   | 0  | WNV               |
| 71 | A160 | Farm B | 46.49 | 80   | 0  | 0   | 0  | 0  | 0  | 0 | 0   | 0  | WNV               |
| 72 | A161 | Farm B | 47.25 | 0    | 0  | 0   | 0  | 0  | 0  | 0 | 0   | 0  | unknown           |
| 73 | A163 | Farm B | 43.21 | 0    | 0  | 0   | 0  | 0  | 0  | 0 | 0   | 0  | unknown           |
| 74 | A164 | Farm B | 49.44 | 0    | 0  | 0   | 0  | 0  | 0  | 0 | 0   | 0  | unknown           |
| 75 | A165 | Farm B | 65.29 | 0    | 0  | 0   | 0  | 0  | 0  | 0 | 0   | 0  | unknown           |
| 76 | A166 | Farm B | 42.37 | 0    | 0  | 0   | 0  | 0  | 0  | 0 | 0   | 0  | unknown           |
| 77 | A167 | Farm B | 43.99 | 40   | 0  | 0   | 20 | 0  | 0  | 0 | 0   | 0  | WNV, FRV          |
| 78 | A170 | Farm B | 51.60 | 0    | 0  | 0   | 20 | 0  | 0  | 0 | 0   | 0  | FRV               |
| 79 | A171 | Farm B | 49.20 | 0    | 0  | 0   | 20 | 0  | 0  | 0 | 0   | 0  | FRV               |
| 80 | A182 | Farm B | 50.04 | 0    | 0  | 0   | 20 | 0  | 0  | 0 | 0   | 0  | FRV               |
| 81 | A206 | Farm B | 45.33 | 20   | 0  | 0   | 20 | 0  | 0  | 0 | 0   | 0  | WNV, FRV          |
| 82 | A209 | Farm B | 50.08 | 0    | ND | 0   | 0  | 0  | 0  | 0 | 0   | 0  | unknown           |
| 83 | A217 | Farm B | 37.50 | 0    | 0  | 0   | 20 | 0  | 0  | 0 | 0   | 0  | FRV               |
| 84 | A229 | Farm B | 41.26 | 0    | 0  | 0   | 40 | 0  | 0  | 0 | 0   | 0  | FRV               |
| 85 | A231 | Farm B | 45.24 | 0    | 0  | 0   | 0  | 0  | 0  | 0 | 0   | 0  | unknown           |
| 86 | A235 | Farm B | 50.80 | 0    | 0  | 0   | 0  | 0  | 0  | 0 | 0   | 0  | unknown           |
| 87 | A236 | Farm B | 56.89 | 40   | 0  | 0   | 20 | ND | 0  | 0 | 0   | 0  | WNV, FRV          |
| 88 | A237 | Farm B | 56.32 | 0    | 0  | 0   | 20 | 0  | 0  | 0 | 0   | 0  | FRV               |
| 89 | A238 | Farm B | 53.56 | 0    | 0  | 0   | 20 | 0  | 0  | 0 | 0   | 0  | FRV               |
| 90 | A239 | Farm B | 58.07 | 0    | 0  | 0   | 0  | 0  | 0  | 0 | 0   | 0  | unknown           |
| 91 | A240 | Farm B | 46.20 | 0    | 0  | 0   | 0  | 0  | 0  | 0 | 0   | 0  | unknown           |
| 92 | A243 | Farm B | 54.06 | 0    | 0  | 0   | 20 | 20 | 0  | 0 | 0   | 0  | FRV, SEPV         |
| 93 | A244 | Farm B | 34.84 | 0    | 0  | 0   | 40 | 0  | 0  | 0 | 0   | 0  | FRV               |
| 94 | A245 | Farm B | 45.55 | 0    | 0  | 0   | 80 | 0  | 0  | 0 | 0   | 0  | FRV               |
| 95 | A246 | Farm B | 41.65 | 0    | 0  | 0   | 40 | 20 | 0  | 0 | 0   | 0  | FRV               |

|     |      |        |       |    |    |   |    |    |    |   |     |   |                   |
|-----|------|--------|-------|----|----|---|----|----|----|---|-----|---|-------------------|
| 96  | A247 | Farm B | 39.92 | 0  | 0  | 0 | 80 | 0  | 0  | 0 | 0   | 0 | FRV               |
| 97  | A248 | Farm B | 47.13 | 0  | 0  | 0 | 40 | 0  | ND | 0 | 0   | 0 | FRV               |
| 98  | A249 | Farm B | 35.12 | 0  | 0  | 0 | 40 | 20 | 0  | 0 | 0   | 0 | FRV               |
| 99  | A254 | Farm B | 32.70 | 0  | 0  | 0 | 40 | 0  | 0  | 0 | 0   | 0 | FRV               |
| 100 | A266 | Farm B | 72.31 | 40 | 0  | 0 | 40 | 20 | 0  | 0 | 0   | 0 | WNV, FRV          |
| 101 | A280 | Farm B | 43.06 | 0  | 0  | 0 | 40 | 0  | 0  | 0 | 0   | 0 | FRV               |
| 102 | A281 | Farm B | 32.40 | 0  | 0  | 0 | 0  | 0  | 0  | 0 | 0   | 0 | unknown           |
| 103 | A282 | Farm B | 71.92 | 0  | 0  | 0 | 20 | 0  | 0  | 0 | 0   | 0 | FRV               |
| 104 | A286 | Farm B | 47.31 | 0  | 0  | 0 | 0  | 0  | ND | 0 | 0   | 0 | unknown           |
| 105 | A293 | Farm B | 36.98 | 0  | ND | 0 | 40 | 0  | 0  | 0 | 0   | 0 | FRV               |
| 106 | A337 | Farm B | 45.36 | 80 | 20 | 0 | 40 | 0  | 0  | 0 | 0   | 0 | WNV, FRV          |
| 107 | A342 | Farm B | 41.88 | 0  | 0  | 0 | 20 | 0  | 0  | 0 | 0   | 0 | FRV               |
| 108 | A343 | Farm B | 45.46 | 0  | 0  | 0 | 40 | 40 | 0  | 0 | 20  | 0 | FRV, STRATV, SEPV |
| 109 | A391 | Farm C | 55.07 | 0  | 0  | 0 | 0  | 0  | 0  | 0 | 0   | 0 | unknown           |
| 110 | A392 | Farm C | 53.97 | 0  | 0  | 0 | 20 | 0  | 0  | 0 | 0   | 0 | FRV               |
| 111 | A393 | Farm C | 52.11 | 0  | 0  | 0 | 20 | 0  | 0  | 0 | 0   | 0 | FRV               |
| 112 | A394 | Farm C | 53.86 | 0  | 0  | 0 | 20 | 0  | 0  | 0 | 0   | 0 | FRV               |
| 113 | A395 | Farm C | 56.03 | 40 | 0  | 0 | 20 | 0  | 0  | 0 | 0   | 0 | WNV, FRV          |
| 114 | A396 | Farm C | 60.78 | 0  | 0  | 0 | 20 | 0  | 0  | 0 | 0   | 0 | FRV               |
| 115 | A397 | Farm C | 52.95 | 0  | 0  | 0 | 20 | 0  | 0  | 0 | 0   | 0 | FRV               |
| 116 | A398 | Farm C | 51.83 | 0  | 0  | 0 | 20 | 0  | 0  | 0 | 0   | 0 | FRV               |
| 117 | A399 | Farm C | 54.67 | 0  | 0  | 0 | 20 | 0  | 0  | 0 | 0   | 0 | FRV               |
| 118 | A400 | Farm C | 55.38 | 0  | 0  | 0 | 0  | 0  | 0  | 0 | 0   | 0 | unknown           |
| 119 | A401 | Farm C | 54.47 | 0  | 0  | 0 | 0  | 0  | 0  | 0 | 0   | 0 | unknown           |
| 120 | A402 | Farm C | 46.12 | 20 | 0  | 0 | 20 | 0  | 0  | 0 | 0   | 0 | WNV, FRV          |
| 121 | A403 | Farm C | 48.54 | 0  | 0  | 0 | 20 | 0  | 0  | 0 | 0   | 0 | FRV               |
| 122 | A404 | Farm C | 42.72 | 0  | 0  | 0 | 20 | 0  | 0  | 0 | 0   | 0 | FRV               |
| 123 | A405 | Farm C | 46.84 | 0  | 0  | 0 | 20 | 0  | 0  | 0 | 0   | 0 | FRV               |
| 124 | A406 | Farm C | 54.62 | 0  | 0  | 0 | 0  | 0  | 0  | 0 | 0   | 0 | unknown           |
| 125 | A407 | Farm C | 53.56 | 20 | 0  | 0 | 20 | 0  | 0  | 0 | 0   | 0 | WNV, FRV          |
| 126 | A408 | Farm C | 52.73 | 0  | 0  | 0 | 0  | 0  | 0  | 0 | 0   | 0 | unknown           |
| 127 | A409 | Farm C | 54.73 | 0  | 0  | 0 | 0  | 0  | 0  | 0 | 0   | 0 | unknown           |
| 128 | A410 | Farm C | 52.88 | 0  | 0  | 0 | 20 | 0  | 0  | 0 | 0   | 0 | FRV               |
| 129 | A440 | Farm C | 47.35 | 0  | ND | 0 | 0  | 40 | 0  | 0 | 0   | 0 | SEPV              |
| 130 | A473 | Farm C | 42.27 | 0  | 0  | 0 | 0  | 0  | 0  | 0 | 160 | 0 | STRATV            |

ND (not determined)

virus neutralisation was inconsistent at the lowest serum dilution and a titre could not be determined

Unknown

these samples were positive in panflaviviruses blocking ELISA (6B6C-1) but did not have neutralising antibodies to any of the tested viruses
